# Supplementary material
Source: publisher figshare collection journal article supplement (https://springernature.figshare.com/ndownloader/files/19783289)
Supplement: Supplementary file 1 [file 19783289]

Measurement(s),chromatin organization involved in regulation of transcription • mRNA • lnc_RNA • miRNA
Technology Type(s),assay for transposase-accessible chromatin using sequencing • RNA sequencing
Factor Type(s),zearalenone exposure
Sample Characteristic - Organism,Sus scrofa
Sample Characteristic - Environment,cereal grain food product • intestinal epithelium
